# Supplementary material
Source: publisher site journal article supplement (https://www.dovepress.com/article/613667)
Supplement: Supplementary file 1 [file Supplementary%20Table%201-3.docx]

**Supplementary Table 1.** Shapiro–Wilk test results evaluating the normality assumption for biochemical parameters measured in rat liver tissue and serum samples

|  |  |  |  | **Biochemical Variables** | | | | | | |
| --- | --- | --- | --- | --- | --- | --- | --- | --- | --- | --- |
|  |  | **Shapiro-Wilk** | **MDA** | **tGSH** | **SOD** | **CAT** | **IL-6** | **ATP** | **ALT** | **AST** |
| Groups | HG | Statistic | 0.916 | 0.956 | 0.972 | 0.925 | 0.983 | 0.945 | 0.921 | 0.945 |
| df | 6 | 6 | 6 | 6 | 6 | 6 | 6 | 6 |
| Sig. | 0.476 | 0.786 | 0.907 | 0.544 | 0.964 | 0.696 | 0.512 | 0.697 |
| OLP | Statistic | 0.831 | 0.964 | 0.927 | 0.924 | 0.983 | 0.884 | 0.878 | 0.956 |
| df | 6 | 6 | 6 | 6 | 6 | 6 | 6 | 6 |
| Sig. | 0.110 | 0.851 | 0.556 | 0.531 | 0.964 | 0.288 | 0.259 | 0.789 |
| ATOL | Statistic | 0.912 | 0.990 | 0.941 | 0.970 | 0.912 | 0.933 | 0.956 | 0.942 |
| df | 6 | 6 | 6 | 6 | 6 | 6 | 6 | 6 |
| Sig. | 0.451 | 0.989 | 0.670 | 0.890 | 0.452 | 0.605 | 0.788 | 0.678 |
| MLOL | Statistic | 0.990 | 0.916 | 0.947 | 0.842 | 0.963 | 0.943 | 0.949 | 0.983 |
| df | 6 | 6 | 6 | 6 | 6 | 6 | 6 | 6 |
| Sig. | 0.990 | 0.477 | 0.714 | 0.136 | 0.846 | 0.683 | 0.735 | 0.965 |

**Footnotes:** Shapiro–Wilk analysis demonstrated that MDA, tGSH, SOD, CAT, IL-6 and ATP levels measured in liver tissue, along with serum ALT and AST levels, conformed to the assumption of normality. Accordingly, intergroup comparisons were performed using one-way ANOVA. *n* = 6 animals per group

**Abbreviations**: HG, healthy group; OLP, olaparib-alone group; ATOL, ATP + olaparib group; MLOL, melatonin + olaparib group; ATP, adenosine triphosphate; MDA: malondialdehyde; tGSH: total glutathione; SOD, superoxide dismutase; CAT, catalase; IL-6, interleukin-6; ATP, adenosine triphosphate; ALT, alanine aminotransferase; AST, aspartate aminotransferase; df: degrees of freedom; Sig: significance.

**Supplementary Table 2.** Levene’s test results evaluating homogeneity of variances for liver tissue MDA, tGSH, SOD, CAT, IL-6 and ATP levels, and serum ALT and AST levels

|  | **Biochemical Variables** | | | | | | | |
| --- | --- | --- | --- | --- | --- | --- | --- | --- |
|  | **MDA** | **tGSH** | **SOD** | **CAT** | **IL-6** | **ATP** | **ALT** | **AST** |
| Levene’s statistic | 2.501 | 0.891 | 2.816 | 2.185 | 0.247 | 0.685 | 1.303 | 3.086 |
| df1 | 3 | 3 | 3 | 3 | 3 | 3 | 3 | 3 |
| df2 | 20 | 20 | 20 | 20 | 20 | 20 | 20 | 20 |
| Sig. | 0.089 | 0.463 | 0.065 | 0.121 | 0.862 | 0.572 | 0.301 | 0.051 |

**Footnotes:** Upon verification of homogeneity of variances, Tukey’s honestly significant difference (HSD) test was employed for post hoc pairwise comparisons of MDA, tGSH, SOD, CAT, IL-6, ATP, ALT, and AST levels. *n* = 6 animals per group.

**Abbreviations**: MDA: malondialdehyde; tGSH: total glutathione; SOD, superoxide dismutase; CAT, catalase; IL-6, interleukin-6; ATP, adenosine triphosphate; ALT, alanine aminotransferase; AST, aspartate aminotransferase; df1, numerator degrees of freedom; df2, denominator degrees of freedom; Sig: significance.

**Supplementary Table 3.** Post hoc multiple comparison p-values for hepatic oxidant, antioxidant, and proinflammatory biomarkers and serum liver function enzymes following ATP, melatonin, and olaparib treatment

|  | **Post hoc *p*-values** | | | | | | | | |
| --- | --- | --- | --- | --- | --- | --- | --- | --- | --- |
| **Group comparisons** | **MDA** | **tGSH** | **SOD** | **CAT** | **IL-6** | **ATP** | **ALT** | **AST** |
| HG vs. OLP | <0.001 | <0.001 | <0.001 | <0.001 | <0.001 | <0.001 | <0.001 | <0.001 |
| HG vs. ATOL | 0.095 | 0.395 | 0.320 | 0.165 | 0.128 | 0.003 | 0.096 | 0.457 |
| HG vs. MLOL | 0.055 | 0.063 | 0.088 | 0.067 | 0.290 | <0.001 | <0.001 | <0.001 |
| OLP vs. ATOL | <0.001 | <0.001 | <0.001 | <0.001 | <0.001 | <0.001 | <0.001 | <0.001 |
| OLP vs. MLOL | <0.001 | <0.001 | <0.001 | <0.001 | <0.001 | <0.001 | <0.001 | <0.001 |
| ATOL vs. MLOL | 0.993 | 0.709 | 0.874 | 0.962 | 0.961 | <0.001 | <0.001 | <0.001 |
| F-value | 163.382 | 183.523 | 177.217 | 229.425 | 60.307 | 322.787 | 214.301 | 1565.236 |
| df (df1 / df2) | 3 / 20 | 3 / 20 | 3 / 20 | 3 / 20 | 3 / 20 | 3 / 20 | 3 / 20 | 3 / 20 |
| *p*-value | <0.001 | <0.001 | <0.001 | <0.001 | <0.001 | <0.001 | <0.001 | <0.001 |

**Footnotes:** Data were analyzed by one-way analysis of variance (ANOVA), followed by Tukey’s honestly significant difference (HSD) test for multiple post hoc comparisons. The sample size for each group was six (*n* = 6).

**Abbreviations**: HG, healthy group; OLP, olaparib-alone group; ATOL, ATP + olaparib group; MLOL, melatonin + olaparib group; MDA: malondialdehyde; tGSH: total glutathione; SOD, superoxide dismutase; CAT, catalase; IL-6, interleukin-6; ATP, adenosine triphosphate; ALT, alanine aminotransferase; AST, aspartate aminotransferase; df, degrees of freedom; df1, numerator degrees of freedom; df2, denominator degrees of freedom.
